# Supplementary material for: Genome-wide association study of seedling–plant resistance to stripe rust in bread wheat (Triticum aestivum L.) genotypes
Source: Front Plant Sci. 2025 May 2;16:1554216. doi: 10.3389/fpls.2025.1554216 (PMC12081426; doi:10.3389/fpls.2025.1554216)
Supplement: Supplementary file 15 [file Table15.xlsx]

## Sheet: Sheet1
Suplementary table 7. Frequency and effect of potentially new QTLs, G=Genotype, DS_Dekaa = Disease severity for Dekaa isolate, DS_Hdasee = Disease severity for Hdasee isolate, DS_Meraro = Disease severity for Meraro isolate, DS_Sanate = Disease severity for Sanate isolate, DS_Combined = Disease severity Combined. SR_Dekaa = Seedling response for Dekaa isolate, SR_Hdasee = Seedling response for Hd…
SN	QTL ID	Chromosome	Position (bp)	Allel ID	DS_Dekaa		DS_Hdasee		DS_Meraro		DS_Sanate		DS_Combined			SR_Dekaa		SR_Hdasee		SR_Meraro		SR_Sanate		SR_Combined			CI_Dekaa		CI_Hdasee		CI_Meraro		CI_Sanate		CI_Combined
					QTL Frequency (%)	Effect	QTL Frequency (%)	Effect	QTL Frequency (%)	Effect	QTL Frequency (%)	Effect	QTL Frequency (%)	Effect	Available in genotypes in all isolates (Combined)	QTL Frequency (%)	Effect	QTL Frequency (%)	Effect	QTL Frequency (%)	Effect	QTL Frequency (%)	Effect	QTL Frequency (%)	Effect	Available in genotypes in all isolates (Combined)	QTL Frequency (%)	Effect	QTL Frequency (%)	Effect	QTL Frequency (%)	Effect	QTL Frequency (%)	Effect	QTL Frequency (%)	Effect	Available in genotypes in all isolates (Combined)
1	qYrSe.10	2B	704118285	1228649|F|0-6:C>T-6:C>T	69	-0.45875	68	-0.0669115	65	0.142385	70	-0.17937	66	-0.161408	G1-G5, G7, G8, G12, G14, G15, G17, G20- G25- G28, G32, G33, G35-G41, G46-G50, G52, G53, G56, G57, G59, G61-G68, G70-G74, G76-G79, G83-G90, G92-G94, G98, G102-G104, G106, G112-G114,G116, G118-G120, G122, G123, G125-G127, G132, G133, G135-G139, G143, G145, G151-G155, G158-G161, G163-G171, G173-G180	71	-0.0557804	74	0.00168117	83	0.00814123	86	2.8805	81	0.708065	G1-G6, G8, G10, G14, G15, G17, G19- G22, G224-G28, G32, G33, G36-G53, G55-G79, G81-G98, G100, G102-G104, G106, G107, G110-G114, G116, G118-G120, G122-G128, G132, G133, G136-G140, G142-G155, G158-G161, G163-G171, G173-G180	67	-0.271171	67	-0.0162666	67	0.0500887	67	-0.0837213	67	-0.0798635	G1-G6, G8, G10, G14, G15, G17, G19- G22- G28, G32, G36-G41, G43-G50, G52, G53, G56, G61-G68, G70-G79, G81-G90, G92-G94, G98, G102-G104, G106, G107, G112-G114, G118-G120, G123-G126, G128, G132, G133, G135, G136, G139, G143-G145, G148, G149, G151-G155, G159-G161, G163, G164, G165-G169, G171, G173-G180
2	qYrSe.14	2D	599219983	1106826|F|0-19:A>G-19:A>G	69	0.398086	68	0.0195352	73	-0.137161	70	-0.141252	79	0.103509	G1-G5, G7, G8, G12-G15, G17, G20- G25- G28, G32, G33, G35-G41, G43, G45-G50-G53, G56, G57, G59, G61-G68, G70-G74, G76-G79, G80, G81, G83-G90, G92-G94, G97, G98, G102-G104, G106, G107, G1010, G112-G114,G116, G118-G120, G122, G123, G125-G128, G1030, G132, G133, G135-G142, G143-G145, G150-G155, G156, G158-G161, G163-G180	74	0.0461716	74	0.0221109	71	0.00596431	71	-5.31553	81	-1.31146	G1-G6, G8, G10, G14, G15, G17, G19- G22, G24-G28, G32, G33, G36-G53, G55-G79, G81-G98, G100, G102-G104, G106, G107, G110-G114, G116, G118-G120, G122-G128, G132, G133, G136-G140, G142-G155, G158-G161, G163-G171, G173-G180	71	0.232434	69	0.0936524	72	-0.0536278	72	0.0857332	74	0.0896442	G1-G5, G8, G10, G12, G14, G15, G17, G19-G22,G24-G28, G32, G36-G50, G52, G55-G59, G61-G68, G70-G79, G81-G90, G92-G94, G96, G98, G102- G104, G106, G107, G110, G112-G114, G116, G118- G120, G122-G126, G132, G133, G135-G140, G143-G145, G148, G149, G151-G168, G171, G173-G180
3	qYrSe.15	2D	612184445	3222426|F|0-7:G>A-7:G>A	82	0.447111	88	0.151784	88	-0.0281403	82	-0.22542	87	0.18953	G1-G5, G7, G8, G12, G14, G15, G17, G20- G25- G28, G32, G33, G35-G41, G46-G50, G52, G53, G56, G57, G59, G61-G68, G70-G74, G76-G79, G83-G90, G92-G94, G98, G102-G104, G106, G112-G114,G116, G118-G120, G122, G123, G125-G127, G132, G133, G135-G139, G143, G145, G151-G155, G158-G161, G163-G171, G173-G180	87	0.0439243	87	0.0250555	66	0.0173813	56	-3.07675	71	-0.746932	G1-G6, G8, G10, G12, G13, G15, G17, G19- G22, G224-G28, G30, G32, G33, G35-G53, G54-G79, G81-G98, G100, G102-G105, G106-G108, G110-G114, G115-G120, G122-G155, G156-G161, G163-G180	82	0.230544	89	0.0747588	86	0.0166906	86	0.0893113	66	0.102949	G1-G5, G8, G10,G12, G14, G15, G17, G19-G22,G24-G28, G30, G32, G33, G36-G79, G81-G94, G96, G98, G102-G104, G106, G107, G112-G114, G116, G118-G120, G122-G126, G128, G132-G140, G143-G146, G148-G161, G163-G180
4	qYrSe.19	3A	707649372	1018354|F|0-6:A>G-6:A>G	73	0.572637	68	0.0141767	81	-0.145178	82	0.196124	79	0.166353	G1-G5, G7, G8, G12-G15, G17, G20- G25- G28, G32, G33, G35-G41, G43, G45-G50-G53, G56, G57, G59, G61-G68, G70-G74, G76-G79, G80, G81, G83-G90, G92-G94, G97, G98, G102-G104, G106, G107, G1010, G112-G114,G116, G118-G120, G122, G123, G125-G128, G1030, G132, G133, G135-G142, G143-G145, G150-G155, G156, G158-G161, G163-G180	75	0.0277121	75	0.00930114	83	0.011355	74	-1.14915	71	-0.274216	G1-G6, G8, G11- G13, G15, G17, G19- G22, G24-G28, G30, G32, G33, G35-G53, G54-G79, G80-G99, G100, G102-G105, G106-G108, G110-G114, G115-G120, G122-G155, G156-G161, G173-G180	81	0.14301	81	0.0374273	86	-0.0207487	86	0.103812	81	0.0659367	G1-G5, G8, G10,G12-G15, G17, G19-G22,G24-G28, G30, G32, G33, G35-G59, G61-G68, G70-G79, G81-G90, G92, G94, G94, G98, G102-G104, G106, G107, G112-G114, G116, G118-G120, G122-G126, G128, G132-G140, G143-G146, G148-G161, G163-G180
5	qYrSe.25	3D	352946923	2294192|F|0-6:T>C-6:T>C	73	-0.304135	88	0.50889	81	-0.0947215	82	0.231846	79	0.1131	G1-G5, G7, G8, G12-G15, G17, G20- G25- G28, G32, G33, G35-G41, G43, G45-G50-G53, G56, G57, G59, G61-G68, G70-G74, G76-G79, G80, G81, G83-G90, G92-G94, G97, G98, G102-G104, G106, G107, G1010, G112-G114,G116, G118-G120, G122, G123, G125-G128, G1030, G132, G133, G135-G142, G143-G145, G150-G155, G156, G158-G161, G163-G180	75	0.00916697	90	0.0521271	87	0.0260149	84	-0.412776	80	-0.0815613	G1-G6, G8, G10, G14, G15, G17, G19- G22, G224-G28, G32, G33, G36-G53, G55-G79, G81-G98, G100, G102-G104, G106, G107, G110-G114, G116, G118-G120, G122-G128, G132, G133, G136-G140, G142-G155, G158-G161, G163-G171, G173-G180	85	-0.0536593	85	0.302093	94	-0.00834214	94	0.188255	84	0.10687	G1-G5, G8, G10,G12-G15, G17, G19-G22,G24-G28, G30, G32, G33, G35-G59, G61-G68, G70-G79, G81-G94, G96-G98, G102-G104, G106, G107, G110, G112-G114, G116, G118-G120, G122-G126, G128, G130, G132-G180
6	qYrSe.36	7A	339749362	1112073|F|0-38:A>G-38:A>G	83	0.094129	82	0.228341	81	0.359155	82	0.514397	79	0.384195	G1-G5, G7, G8, G12-G15, G17, G20- G25- G28, G32, G33, G35-G41, G43, G45-G50-G53, G56, G57, G59, G61-G68, G70-G74, G76-G79, G80, G81, G83-G90, G92-G94, G97, G98, G102-G104, G106, G107, G1010, G112-G114,G116, G118-G120, G122, G123, G125-G128, G1030, G132, G133, G135-G142, G143-G145, G150-G155, G156, G158-G161, G163-G180	85	0.0257503	74	0.0302026	83	0.0470751	80	-6.07091	80	-1.49302	G1-G5, G8, G10, G114,-G17, G19-G22, G24-G30, G32, G33, G36-G94, G96, G98, G102-G104, G106, G107, G110-G114, G116, G118-G120, G122-G126, G128, G132, G133, G136-140, G142-G155, G158-G161, G163-171, G173-G180	86	0.0810645	85	0.133341	81	0.206584	81	0.468014	80	0.222428	G1-G5, G8, G10,G12, G114, G15, G17, G19-G22,G24-G28, G30, G32, G33, G36-G59, G61-G68, G70-G79, G81-G94, G96, G98, G102-G104, G106, G107, G110, G112-G114, G116, G118-G120, G122-G126, G128, G130, G132-140, G144-G180
7	qYrSe.37	7A	636900029	1073246|F|0-21:C>A-21:C>A	90	-0.0180324	94	0.151604	87	-0.255768	88	0.101518	87	0.189642	G1-G5, G7, G8, G10, G12-G15, G17, G19-G28, G30, G32, G33, G35-G90, G92-G99, G97, G98, G100, G102-G104, G106, G107, G109-G120, G122-G130, G132-G161, G171-G180	87	0.0245311	79	0.022281	83	-0.0196142	84	-6.77797	85	-1.67151	G1-G5, G8, G10, G113,-G115, G17, G19-G22, G24-G28, G30, G32, G35,G90, G92-G94, G96-G98, G100, G102-G107, G110-G114, G116-G120, G122-G128, G132, G133, G134, G136-140, G143-G161, G163-171, G173-G180	86	0.031121	94	0.363876	94	-0.133805	94	0.113915	94	0.124649	G1-G8, G10, G12-G15, G17-G28, G30, G32-G90, G92-G98, G102-G120, G122-G180
